# Supplementary material for: Hierarchically porous Fe,N-doped carbon nanorods derived from 1D Fe-doped MOFs as highly efficient oxygen reduction electrocatalysts in both alkaline and acidic media
Source: Royal Society of Chemistry journal article supplement (doi:10.1039/d1nr01603b), 2021-01-01
Supplement: d1nr01603b1.pdf [file d1nr01603b1.pdf]

This supplementary information was **updated** on

**21/01/2022.**

**Hierarchically porous Fe,N-doped carbon nanorods derived from 1D Fe-doped MOFs as highly efficient oxygen reduction electrocatalysts in both alkaline and acidic media**

The authors regret that an incorrect image was used in Figure S3, panel *i* for the TEM images of 3Fe-N/C-NR, and Figure S3 has therefore been replaced in this document. The original Figure S3 and caption is displayed below for future reference:

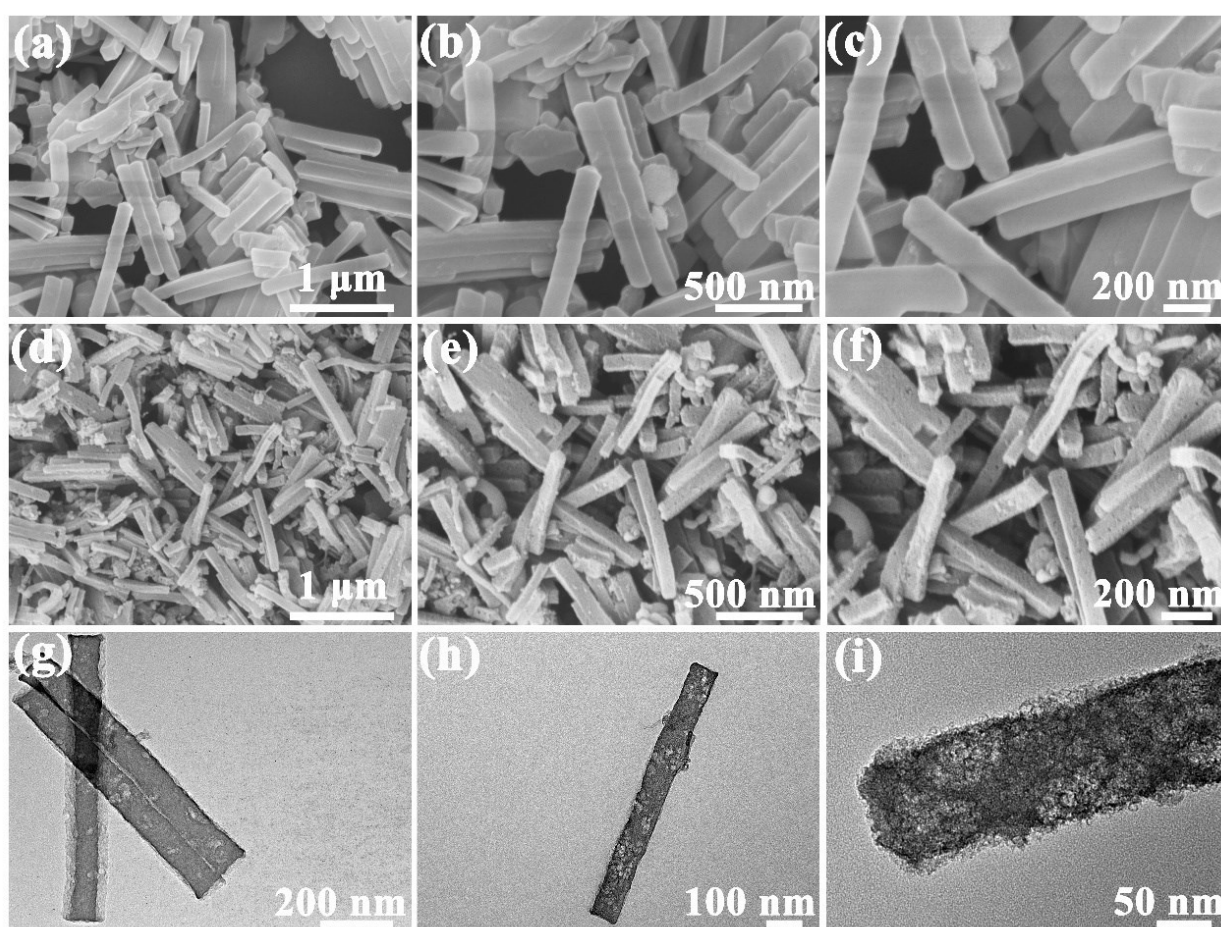

**Figure S3.** SEM images of (a, b, c) 3Fe-ZIF-NR and (d, e, f) 3Fe-N/C-NR; TEM images of (g, h, i) 3Fe-N/C-NR.

Please contact [Nanoscale@rsc.org](mailto:Nanoscale@rsc.org) with any inquiries, citing the DOI:  
[doi.org/10.1039/D1NR01603B](https://doi.org/10.1039/D1NR01603B)

## Supporting Information

### **Hierarchically Porous Fe, N-doped Carbon Nanorods Derived from 1D Fe-doped MOF as Highly Efficient Oxygen Reduction**

### **Electrocatalysts in Both Alkaline and Acidic Media**

Hao Li,<sup>1a</sup> Xiao Chen,<sup>1b</sup> Junying Chen,<sup>a</sup> Kui Shen<sup>\*a</sup> and Yingwei Li<sup>\*a</sup>

*<sup>a</sup>Key Laboratory of Fuel Cell Technology of Guangdong Province, School of Chemistry and Chemical Engineering, South China University of Technology, Guangzhou 510640, China*

*<sup>b</sup>Beijing Key Laboratory of Green Chemical Reaction Engineering and Technology, Department of Chemical Engineering, Tsinghua University, Beijing 100084, China*

*E-mail address: cekshen@scut.edu.cn (K.S.); liyw@scut.edu.cn (Y.L.)*

*1 These two authors contributed equally to this work.*

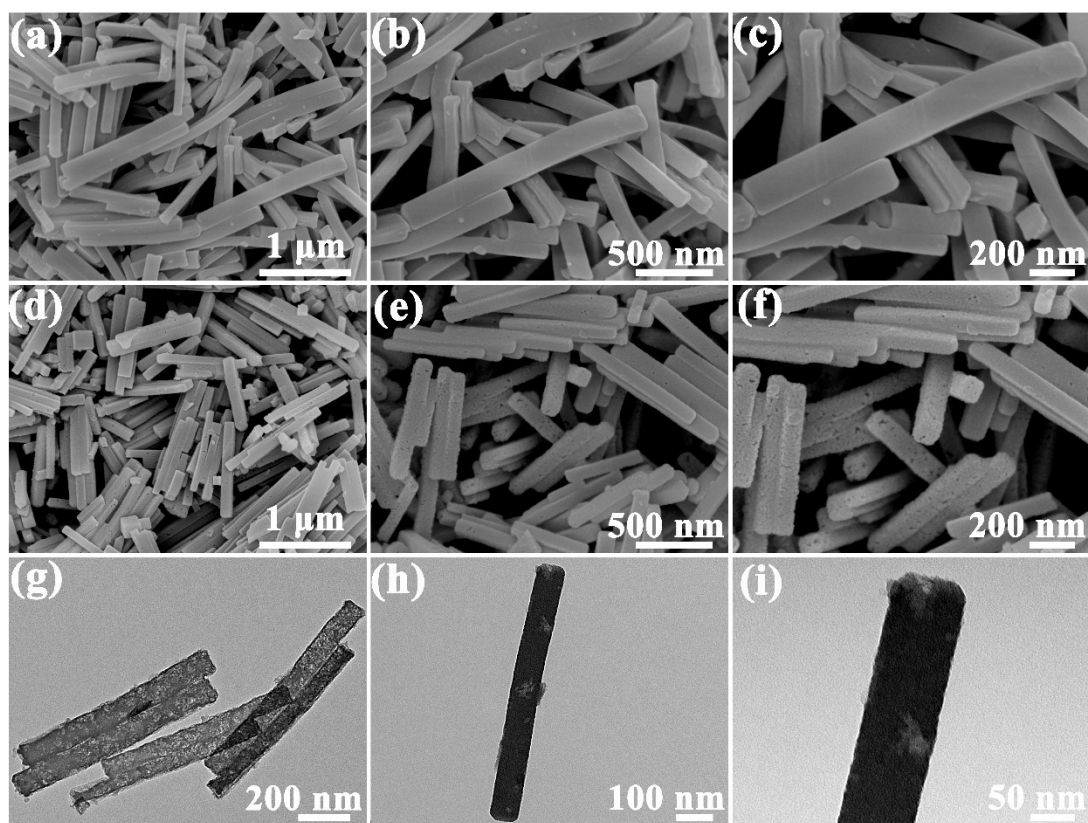

**Figure S1.** SEM images of (a, b, c) ZIF-8-NR and (d, e, f) N/C-NR; TEM images of (g, h, i) N/C-NR.

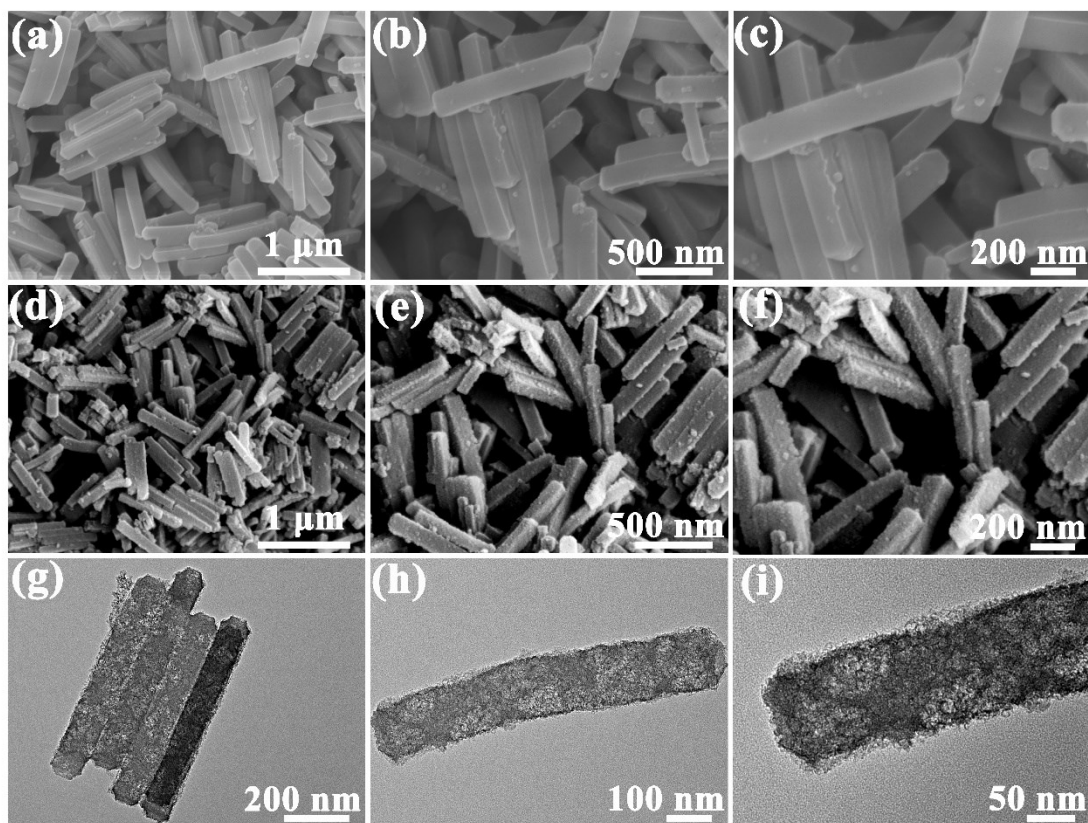

**Figure S2.** SEM images of (a, b, c) 1Fe-ZIF-NR and (d, e, f) 1Fe- N/C-NR; TEM images of (g, h, i) 1Fe-N/C-NR.

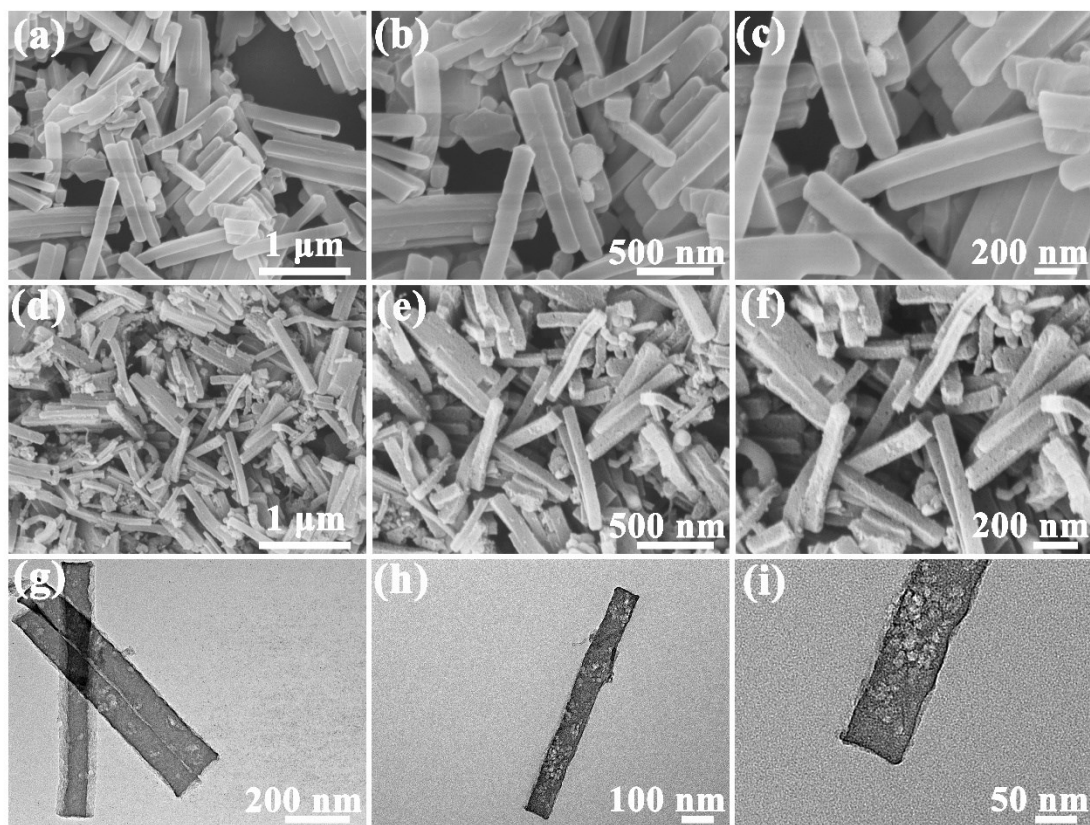

**Figure S3.** SEM images of (a, b, c) 3Fe-ZIF-NR and (d, e, f) 3Fe- N/C-NR; TEM images of (g, h, i) 3Fe-N/C-NR.

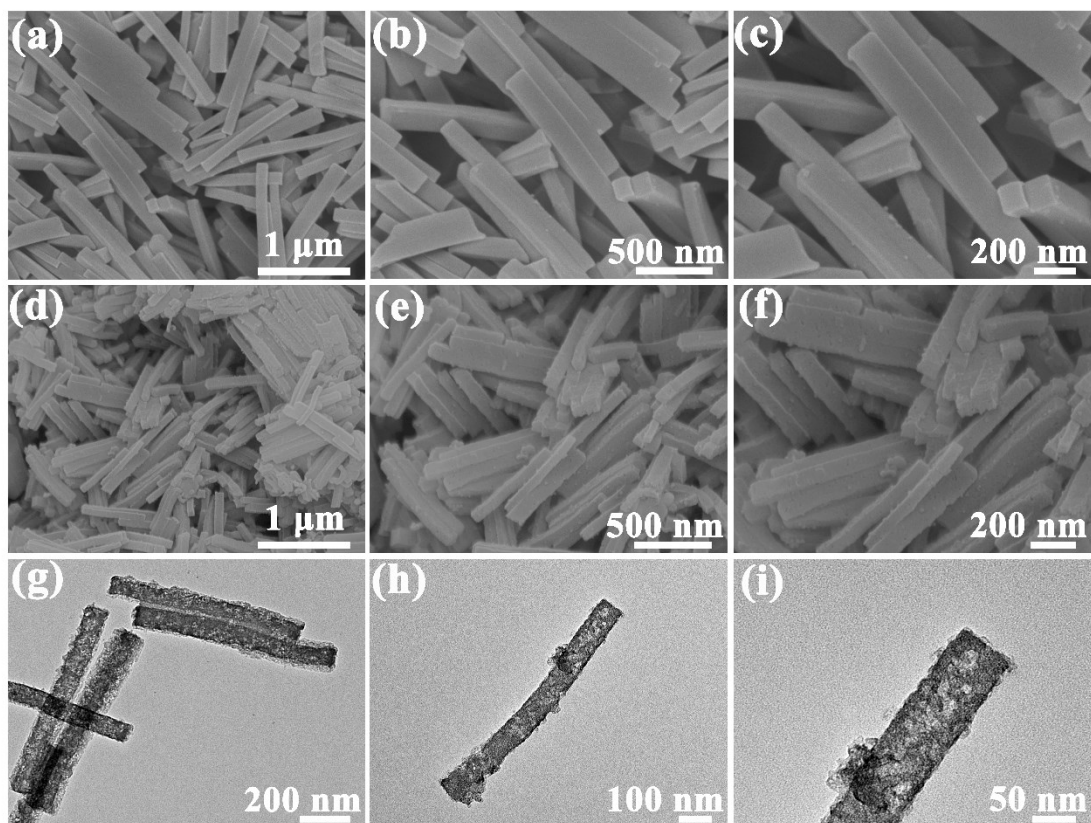

**Figure S4.** SEM images of (a, b, c) 5Fe-ZIF-NR and (d, e, f) 5Fe-N/C-NR; TEM images of (g, h, i) 5Fe-N/C-NR.

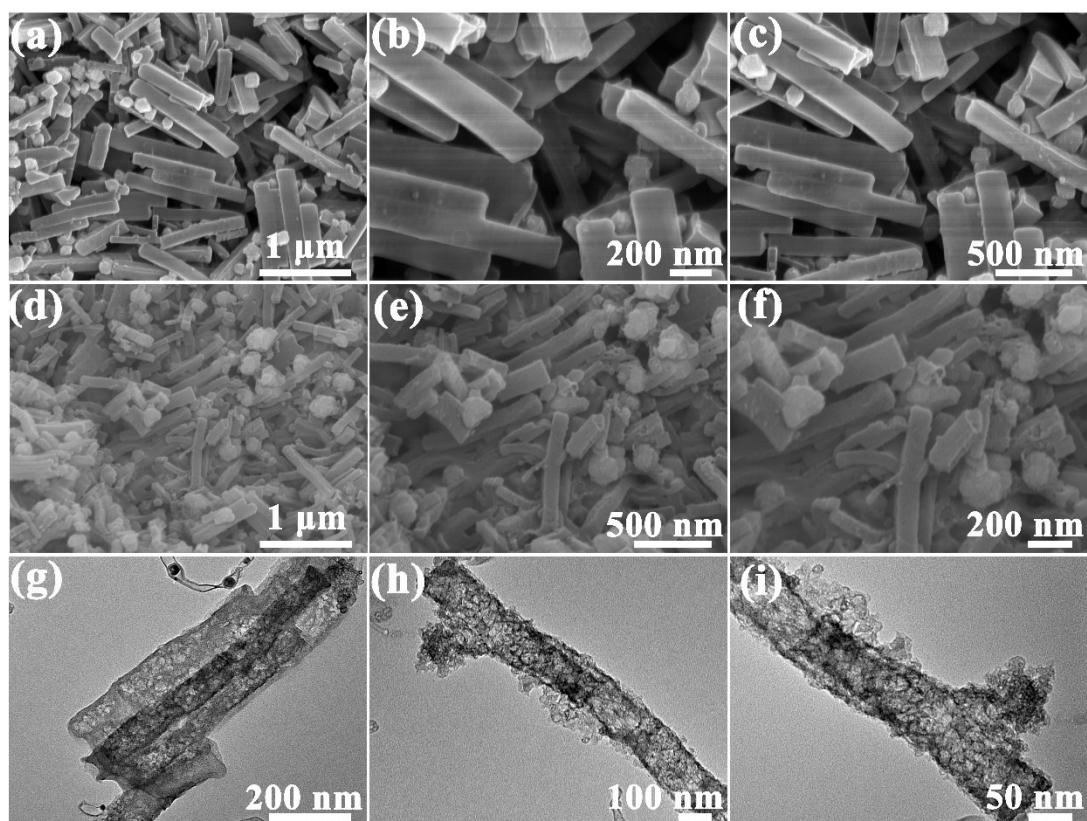

**Figure S5.** SEM images of (a, b, c) 7Fe-ZIF-NR and (d, e, f) 7Fe- N/C-NR; TEM images of (g, h, i) 7Fe-N/C-NR.

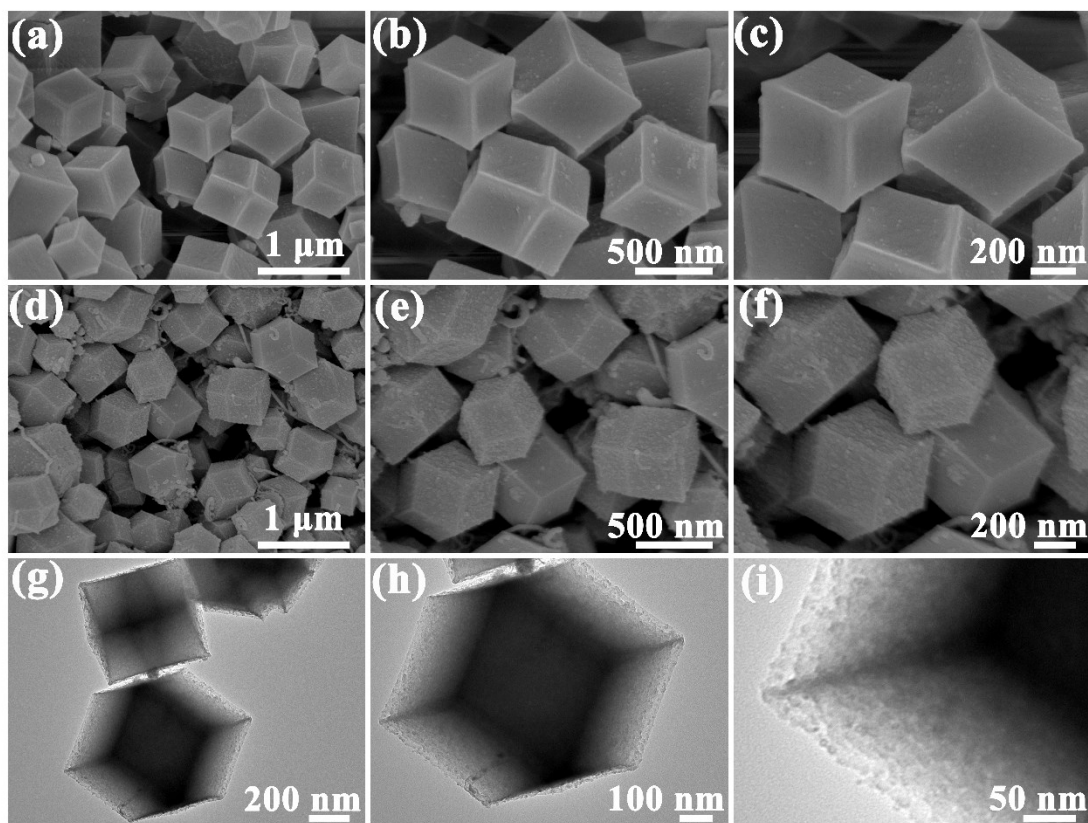

**Figure S6.** SEM images of (a, b, c) 5Fe-ZIF-RD and (d, e, f) 5Fe-N/C-RD; TEM images of (g, h, i) 5Fe-N/C-RD.



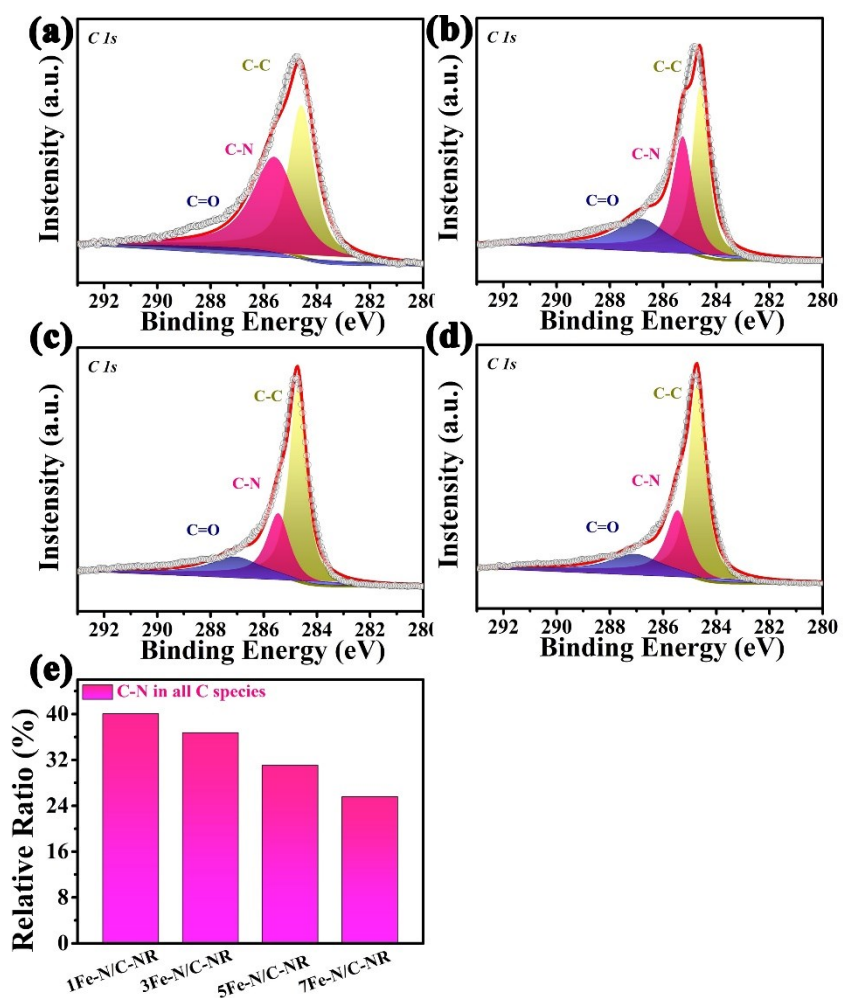

**Figure S7.** C 1s XPS spectra of (a) 1Fe-N/C-NR, (b) 3Fe-N/C-NR, (c) 5Fe-N/C-NR and (d) 7Fe-N/C-NR. (e)

The contents of C-N in all C species (C-C, C-N and C=O) for all samples.

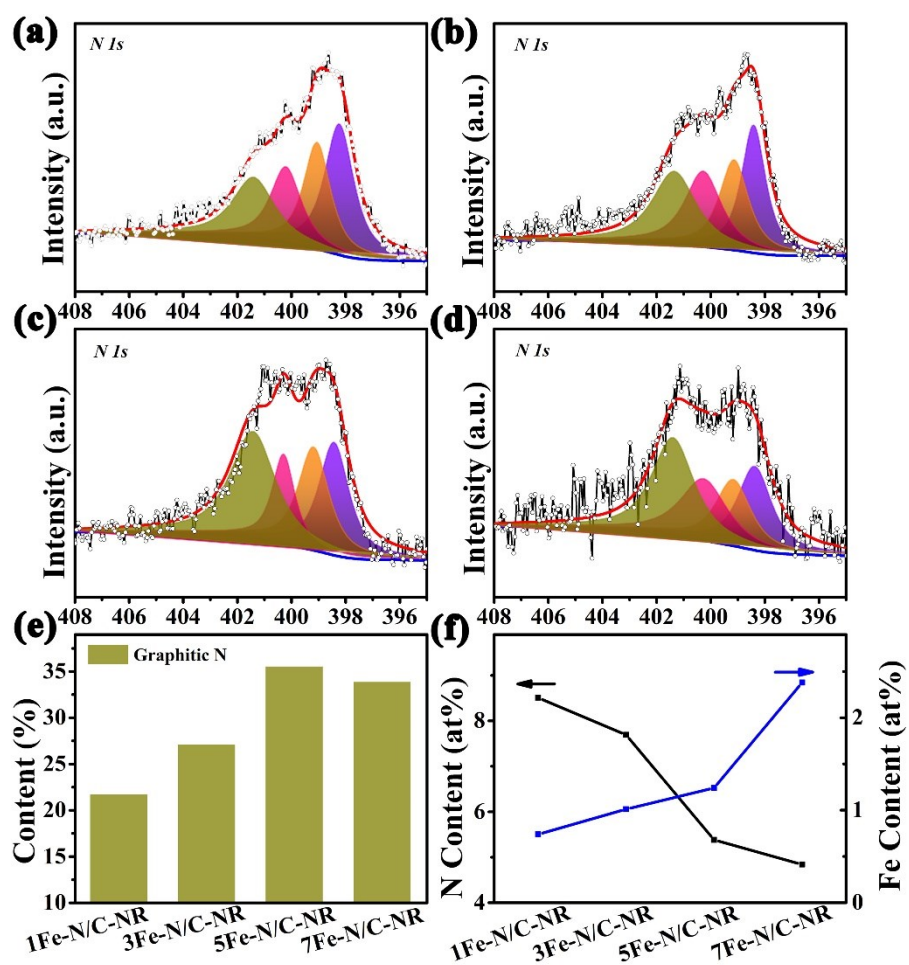

**Figure S8.** N 1s XPS spectra of (a) 1Fe-N/C-NR, (b) 3Fe-N/C-NR, (c) 5Fe-N/C-NR and (d) 7Fe-N/C-NR. (e) The contents of graphitic N in all N species (pyridinic N, pyrrolic N, N-Fe and graphitic N) for all samples. (f) Influence of iron doping on the N and Fe contents of various catalysts based on XPS analysis.

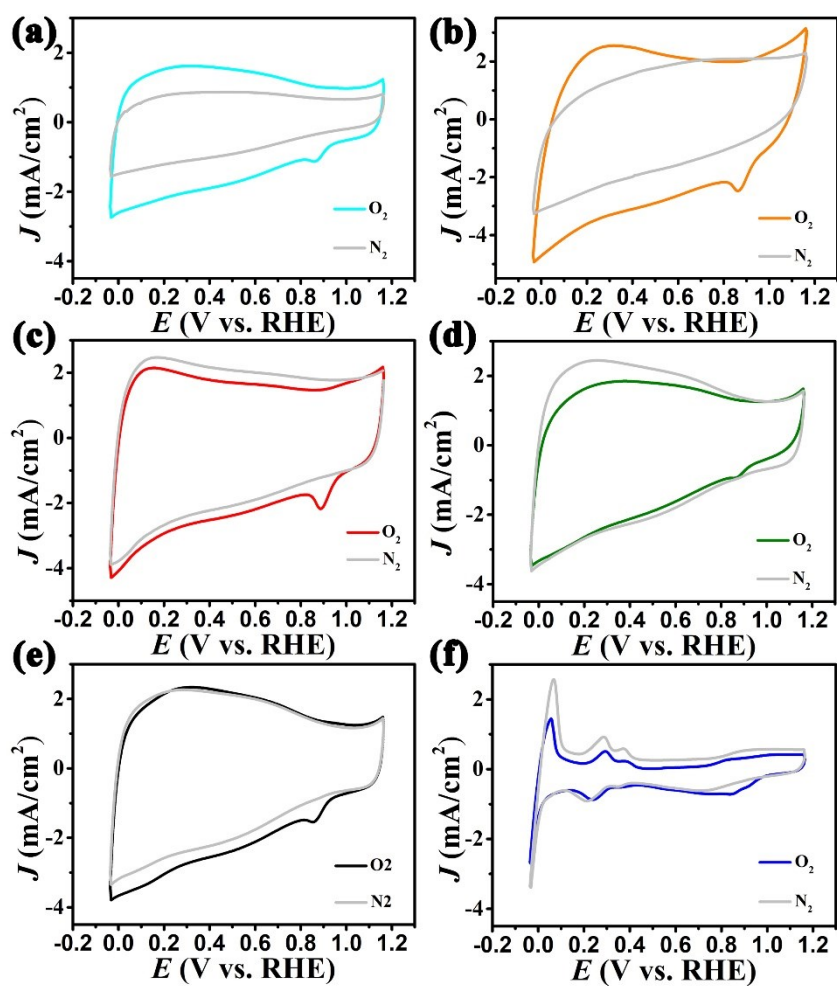

**Figure S9.** CV curves of (a) 1Fe-N/C-NR, (b) 3Fe-N/C-NR, (c) 5Fe-N/C-NR, (d) 7Fe-N/C-NR, (e) 5Fe-N/C-NR and (f) Pt/C in N<sub>2</sub>-saturated and O<sub>2</sub>-saturated 0.1 M KOH solution.

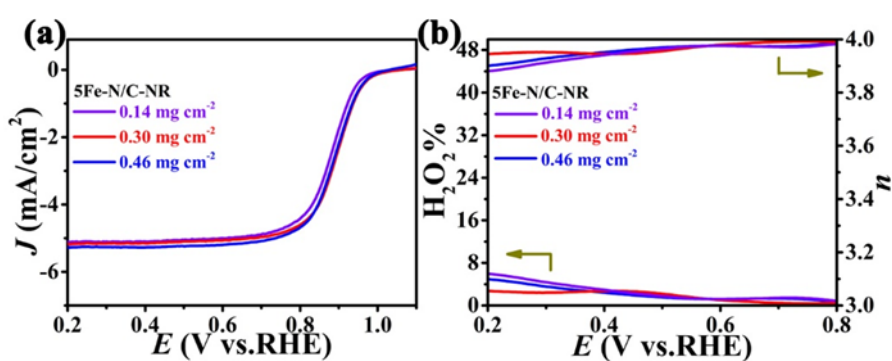

**Figure S10.** (a) LSV curves and (b) electron-transfer numbers and H<sub>2</sub>O<sub>2</sub> yields for various 5Fe-N/C-NR catalyst loadings, at 1600 rpm in 0.1 M KOH electrolyte.

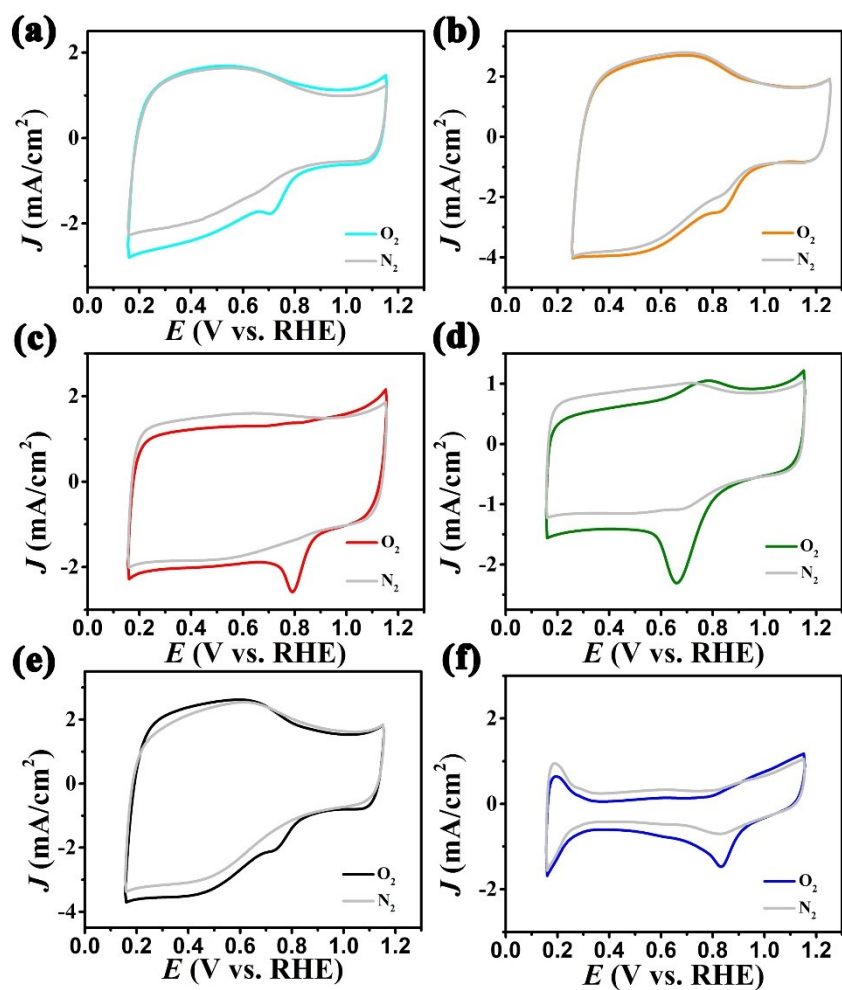

**Figure S11.** CV curves of (a) 1Fe-N/C-NR, (b) 3Fe-N/C-NR, (c) 5Fe-N/C-NR, (d) 7Fe-N/C-NR, (e) 5Fe-N/C-RD and (f) Pt/C in  $N_2$ -saturated and  $O_2$ -saturated 0.1 M  $HClO_4$  solution.

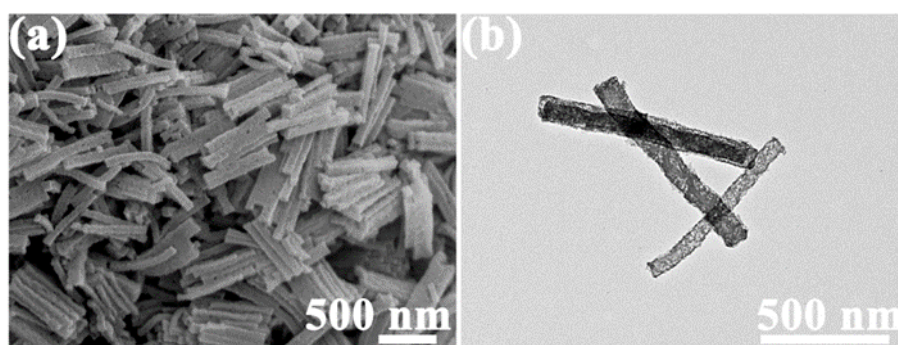

**Figure S12.** (a) SEM and (b) TEM images of 5Fe-N/C-NR after the stability test in acidic electrolyte.

**Table S1.** BET surface areas, total pore volumes, miropore volume, meso/macropore volume and element contents of various samples measured by XPS analysis

| Samples    | $S_{\text{BET}}$<br>( $\text{m}^2/\text{g}$ ) | Total pore<br>volume<br>( $\text{cm}^3/\text{g}$ ) | Miropore<br>volume<br>( $\text{cm}^3/\text{g}$ ) | Meso/macropore<br>volume ( $\text{cm}^3/\text{g}$ ) | Element contents<br>(at. %) |      |      |
|------------|-----------------------------------------------|----------------------------------------------------|--------------------------------------------------|-----------------------------------------------------|-----------------------------|------|------|
|            |                                               |                                                    |                                                  |                                                     | C                           | N    | Fe   |
| N/C        | 939                                           | 0.59                                               | 0.44                                             | 0.15                                                | -                           | -    | -    |
| 1Fe-N/C-NR | 819                                           | 0.50                                               | 0.39                                             | 0.11                                                | 81.75                       | 8.51 | 0.74 |
| 3Fe-N/C-NR | 612                                           | 0.48                                               | 0.29                                             | 0.19                                                | 81.77                       | 7.69 | 1.01 |
| 5Fe-N/C-NR | 502                                           | 0.44                                               | 0.24                                             | 0.20                                                | 80.86                       | 5.38 | 1.24 |
| 7Fe-N/C-NR | 379                                           | 0.44                                               | 0.19                                             | 0.25                                                | 80.80                       | 4.84 | 2.38 |

**Table S2.** The contents of different types of C and N for various samples form XPS analysis.

| Samples    | C type |        |        | N type            |             |                  |                   |
|------------|--------|--------|--------|-------------------|-------------|------------------|-------------------|
|            | C–C(%) | C–N(%) | C=O(%) | Pyridinic<br>N(%) | N–Fe<br>(%) | Pyrrolic<br>N(%) | Graphitic<br>N(%) |
| 1Fe-N/C-NR | 38.20  | 40.05  | 21.75  | 33.28             | 24.95       | 20.14            | 21.63             |
| 3Fe-N/C-NR | 42.85  | 36.73  | 20.42  | 26.79             | 22.65       | 23.52            | 27.04             |
| 5Fe-N/C-NR | 46.48  | 31.04  | 22.48  | 25.54             | 22.46       | 15.07            | 36.93             |
| 7Fe-N/C-NR | 60.41  | 25.57  | 14.02  | 14.85             | 22.14       | 27.52            | 35.49             |

**Table S3.** Comparison of the onset potentials and the half-wave potentials toward ORR for literature-reported Fe-based catalysts and 5Fe-N/C-NR from this work under alkaline conditions.

| Electrocatalysts                                         | $E_{\text{onset}}$<br>(V vs. RHE) | $E_{1/2}$<br>(V vs. RHE) | Electrolyte | References |
|----------------------------------------------------------|-----------------------------------|--------------------------|-------------|------------|
| Fe-SAC/NC                                                | 0.95                              | 0.84                     | 0.1 M KOH   | [1]        |
| Fe-CZIF-800-10                                           | 0.982                             | 0.830                    | 0.1 M KOH   | [2]        |
| Fe,N-HPCC                                                | 0.972                             | 0.898                    | 0.1 M KOH   | [3]        |
| Fe <sub>14</sub> NDC-9                                   | 0.968                             | 0.888                    | 0.1 M KOH   | [4]        |
| Fe(1,10-phen)/KB                                         | 0.966                             | 0.861                    | 0.1 M KOH   | [5]        |
| Fe-N-HPC-AH                                              | 0.97                              | 0.87                     | 0.1 M KOH   | [6]        |
| Fe/N/C                                                   | 0.94                              | 0.84                     | 0.1 M KOH   | [7]        |
| Fe-N-C                                                   | 0.971                             | 0.844                    | 0.1 M KOH   | [8]        |
| Fe <sub>0.5</sub> -950                                   | 0.97                              | 0.89                     | 0.1 M KOH   | [9]        |
| Fe SAs-N/C-20                                            | 0.97                              | 0.909                    | 0.1 M KOH   | [10]       |
| Fe@Aza-PON                                               | 0.9                               | 0.839                    | 0.1 M KOH   | [11]       |
| SA-Fe-HPC                                                | 0.96                              | 0.89                     | 0.1 M KOH   | [12]       |
| Fe <sub>0.2</sub> N <sub>0.2</sub> M <sub>0.2</sub> -900 | 0.970                             | 0.873                    | 0.1 M KOH   | [13]       |
| FeCo                                                     | 0.995                             | 0.920                    | 0.1 M KOH   | [14]       |
| (Fe,Co)/N-C                                              | 1.06                              | 0.863                    | 0.1 M KOH   | [15]       |
| Fe/N/S-CNTs                                              | 0.987                             | 0.887                    | 0.1 M KOH   | [16]       |
| FeSAs/PTF-600                                            | 1.01                              | 0.87                     | 0.1 M KOH   | [17]       |
| CA-Fe/MF-N900                                            | 0.98                              | 0.83                     | 0.1 M KOH   | [18]       |
| Fe/N/S-PCNT                                              | 0.96                              | 0.84                     | 0.1 M KOH   | [19]       |
| C-FeZIF-900-0.84                                         | 0.95                              | 0.84                     | 0.1 M KOH   | [20]       |
| Fe/N/C-1000-2                                            | 1.0                               | 0.87                     | 0.1 M KOH   | [21]       |
| Fe <sub>3</sub> -NG                                      | 0.965                             | 0.826                    | 0.1 M KOH   | [22]       |
| Fe <sub>3</sub> C@NG-800-0.2                             | 0.98                              | 0.83                     | 0.1 M KOH   | [23]       |
| S-Fe/N/C                                                 | 0.91                              | 0.84                     | 0.1 M KOH   | [24]       |

|                                               |       |       |           |           |
|-----------------------------------------------|-------|-------|-----------|-----------|
| Fe <sub>3</sub> C@N-CNT                       | 0.97  | 0.85  | 0.1 M KOH | [25]      |
| Fe-N-CC                                       | 0.94  | 0.83  | 0.1 M KOH | [26]      |
| Fe-N-CNFs                                     | 0.93  | 0.82  | 0.1 M KOH | [27]      |
| 6%Fe-N-S CNN                                  | 0.91  | 0.85  | 0.1 M KOH | [28]      |
| FeN <sub>x</sub> -CN/g-GEL                    | 1.0   | 0.9   | 0.1 M KOH | [29]      |
| C-ZIF/LFP                                     | 0.98  | 0.88  | 0.1 M KOH | [30]      |
| Fe-Fe <sub>3</sub> C@Fe-N-C                   | 0.97  | 0.88  | 0.1 M KOH | [31]      |
| C-FeZIF-1.44-950                              | 0.99  | 0.864 | 0.1 M KOH | [32]      |
| FeNC-1000                                     | 0.99  | 0.90  | 0.1 M KOH | [33]      |
| C-Fe(OH) <sub>3</sub> @ZIF-1000               | 0.99  | 0.88  | 0.1 M KOH | [34]      |
| Fe <sub>2</sub> -Z8-C                         | 0.985 | 0.871 | 0.1 M KOH | [35]      |
| Fe-N-C-3                                      | 0.91  | 0.805 | 0.1 M KOH | [36]      |
| Cu@Fe-N-C                                     | 1.01  | 0.892 | 0.1 M KOH | [37]      |
| mC-TpBpy-Fe                                   | 0.92  | 0.845 | 0.1 M KOH | [38]      |
| Fe,Co,N-CNP(0.3)                              | 0.979 | 0.875 | 0.1 M KOH | [39]      |
| FeNC-20-1000                                  | 1.040 | 0.88  | 0.1 M KOH | [40]      |
| CPM-99Fe/C                                    | 0.95  | 0.802 | 0.1 M KOH | [41]      |
| Fe(0)@FeNC                                    | 0.946 | 0.852 | 0.1 M KOH | [42]      |
| NiFe-N/C                                      | 0.99  | 0.81  | 0.1 M KOH | [43]      |
| S/N_Fe <sub>27</sub>                          | 0.93  | 0.87  | 0.1 M KOH | [44]      |
| Fe <sub>0.5</sub> Co <sub>0.5</sub> Pc-CP     | 0.937 | 0.848 | 0.1 M KOH | [45]      |
| FePcZnPor-CMP                                 | 0.936 | 0.866 | 0.1 M KOH | [46]      |
| FePhenMOF-ArNH <sub>3</sub>                   | 0.98  | 0.78  | 0.1 M KOH | [47]      |
| Fe NS-PC-800                                  | 0.95  | 0.85  | 0.1 M KOH | [48]      |
| NFe/CNs-700                                   | 0.937 | 0.863 | 0.1 M KOH | [49]      |
| COP-TPP(Fe)@MOF-900                           | 0.99  | 0.828 | 0.1 M KOH | [50]      |
| Fe <sub>0.3</sub> Co <sub>0.7</sub> /NC cages | 0.98  | 0.88  | 0.1 M KOH | [51]      |
| Fe-NMCSs                                      | 1.03  | 0.86  | 0.1 M KOH | [52]      |
| 5Fe-N/C-NR                                    | 1.01  | 0.90  | 0.1 M KOH | This work |

|      |      |      |           |           |
|------|------|------|-----------|-----------|
| Pt/C | 0.95 | 0.86 | 0.1 M KOH | This work |
|------|------|------|-----------|-----------|

$E_{\text{onset}}$ : Onset potential;  $E_{1/2}$ : Half-wave potential

**Table S4.** Comparison of the onset potentials and the half-wave potentials toward ORR for literature-reported Fe-based catalysts and 5Fe-N/C-NR from this work under acidic conditions.

| Electrocatalysts                                          | $E_{\text{onset}}$<br>(V vs. RHE) | $E_{1/2}$<br>(V vs. RHE) | Electrolyte                          | References |
|-----------------------------------------------------------|-----------------------------------|--------------------------|--------------------------------------|------------|
| Fe-SAC/NC                                                 | 0.80                              | 0.69                     | 0.5 M H <sub>2</sub> SO <sub>4</sub> | [1]        |
| Fe-N-HPCC                                                 | -                                 | 0.76                     | 0.1 M HClO <sub>4</sub>              | [3]        |
| Fe-N-C                                                    | -                                 | 0.657                    | 0.1 M HClO <sub>4</sub>              | [8]        |
| Fe-N-C-950                                                | 0.92                              | 0.78                     | 0.1 M HClO <sub>4</sub>              | [53]       |
| Meso-Fe-N-C/N-G                                           | 0.83                              | 0.72                     | 0.1 M HClO <sub>4</sub>              | [54]       |
| Fe <sub>SA</sub> -N-C                                     | 0.93                              | 0.78                     | 0.1 M HClO <sub>4</sub>              | [55]       |
| AT-BP-E                                                   | -                                 | 0.78                     | 0.1 M HClO <sub>4</sub>              | [56]       |
| Fe <sub>1</sub> -N-NG/RGO                                 | 0.96                              | 0.84                     | 0.1 M HClO <sub>4</sub>              | [57]       |
| FeNC-1000                                                 | 0.89                              | 0.80                     | 0.5 M H <sub>2</sub> SO <sub>4</sub> | [33]       |
| f-FeCoNC                                                  | 0.87                              | 0.81                     | 0.1 M HClO <sub>4</sub>              | [58]       |
| 1MIL/40ZIF-1000                                           | 0.83                              | 0.79                     | 0.5 M H <sub>2</sub> SO <sub>4</sub> | [31]       |
| C-FeHZ <sub>8</sub> @g-C <sub>3</sub> N <sub>4</sub> -950 | 0.90                              | 0.78                     | 0.1 M HClO <sub>4</sub>              | [59]       |
| 5Fe-N/C-NR                                                | 0.94                              | 0.81                     | 0.1 M HClO <sub>4</sub>              | This work  |
| Pt/C                                                      | 0.94                              | 0.81                     | 0.1 M HClO <sub>4</sub>              | This work  |



- 1 J. Hu, D. Wu, C. Zhu, C. Hao, C. Xin, J. Zhang, J. Guo, N. Li, G. Zhang and Y. Shi, *Nano Energy*, 2020, **72**, 104670.
- 2 G. Li, J. Zhang, W. Li, K. Fan and C. Xu, *Nanoscale*, 2018, **10**, 9252-9260.
- 3 Z. Guo, Z. Zhang, Z. Li, M. Dou and F. Wang, *Nano Energy*, 2019, **57**, 108-117.
- 4 M. Hoque, S. Zhang, M. L. Thomas, Z. Li, S. Suzuki, A. Ando, M. Yanagi, Y. Kobayashi, K. Dokko and M. Watanabe, *J. Mater. Chem. A*, 2018, **6**, 1138-1149.
- 5 M. Kim, J. M. Yoo, C. Y. Ahn, J. H. Jang, Y. J. Son, H. Shin, J. Kang, Y. S. Kang, S. J. Yoo, K. S. Lee and Y. E. Sung, *ChemCatChem*, 2019, **11**, 5982-5988.
- 6 H. Li, Z. Zhang, M. Dou and F. Wang, *Chemistry*, 2018, **24**, 8848-8856.
- 7 Y. Yu, D. Xiao, J. Ma, C. Chen, K. Li, J. Ma, Y. Liao, L. Zheng and X. Zuo, *RSC Adv.*, 2018, **8**, 24509-24516.
- 8 X. Zhang, X. Huang, W. Hu and Y. Huang, *Int. J. Hydrogen Energy*, 2019, **44**, 27379-27389.
- 9 A. Zitolo, V. Goellner, V. Armel, M.T. Sougrati, T. Mineva, L. Stievano, E. Fonda and F. Jaouen, *Nat. Mater.*, 2015, **14**, 937-942.
- 10 R. Jiang, L. Li, T. Sheng, G. Hu, Y. Chen and L. Wang, *J. Am. Chem. Soc.*, 2018, **140**, 11594-11598.
- 11 S. J. Kim, J. Mahmood, C. Kim, G. F. Han, S. W. Kim, S. M. Jung, G. Zhu, J. J. De Yoreo, G. Kim and J. B. Baek, *J. Am. Chem. Soc.*, 2018, **140**, 1737-1742.
- 12 Z. Zhang, J. Sun, F. Wang and L. Dai, *Angew. Chem. Int. Ed.*, 2018, **57**, 9038-9043.
- 13 W. Yang, Y. Zhang, X. Liu, L. Chen and J. Jia, *Chem. Commun.*, 2017, **53**, 12934-12937.
- 14 D. Zhang, W. Chen, Z. Li, Y. Chen, L. Zheng, Y. Gong, Q. Li, R. Shen, Y. Han, W. C. Cheong, L. Gu and Y. Li, *Chem. Commun.*, 2018, **54**, 4274-4277.
- 15 J. Wang, Z. Huang, W. Liu, C. Chang, H. Tang, Z. Li, W. Chen, C. Jia, T. Yao, S. Wei, Y. Wu and Y. Li, *J. Am. Chem. Soc.*, 2017, **139**, 17281-17284.
- 16 H. Jin, H. Zhou, W. Li, Z. Wang, J. Yang, Y. Xiong, D. He, L. Chen and S. Mu, *J. Mater. Chem. A*, 2018, **6**, 20093-20099.
- 17 J. D. Yi, R. Xu, Q. Wu, T. Zhang, K. T. Zang, J. Luo, Y. L. Liang, Y. B. Huang and R. Cao, *ACS Energy Lett.*, 2018, **3**, 883-889.
- 18 J. Liu, Y. Zhu, C. Fan, J. Wang, F. Du and L. Jiang, *Energy Technology*, 2020, **8**, 2000149.
- 19 Z. Tan, H. Li, Q. Feng, L. Jiang, H. Pan, Z. Huang, Q. Zhou, H. Zhou, S. Ma and Y. Kuang, *J. Mater. Chem. A*, 2019, **7**, 1607-1615.
- 20 Y. Deng, Y. Dong, G. Wang, K. Sun, X. Shi, L. Zheng, X. Li and S. Liao, *ACS Appl. Mater. Interfaces*, 2017, **9**, 9699-9709.
- 21 J. W. Huang, Y. B. Chen, X. Liu, Y. C. Huang, Y. L. Ding, Y. Xu, H. C. Yao, H. B. Zhu and H. Yang, *Chem. Commun.*, 2019, **55**, 6930-6933.
- 22 X. Cui, S. Yang, X. Yan, J. Leng, S. Shuang, P. M. Ajayan and Z. Zhang, *Adv. Funct. Mater.*, 2016, **26**, 5708-5717.
- 23 H. Jiang, Y. Yao, Y. Zhu, Y. Liu, Y. Su, X. Yang and C. Li, *ACS Appl. Mater. Interfaces*, 2015, **7**, 21511-21520.
- 24 K. Hu, L. Tao, D. Liu, J. Huo and S. Wang, *ACS Appl. Mater. Interfaces*, 2016, **8**, 19379-19385.
- 25 B. Y. Guan, L. Yu and X. W. Lou, *Energy Environ. Sci.*, 2016, **9**, 3092-3096.
- 26 G. A. Ferrero, K. Preuss, A. Marinovic, A. B. Jorge, N. Mansor, D. J. Brett, A. B. Fuertes, M. Sevilla and M. M. Titirici, *ACS Nano*, 2016, **10**, 5922-5932.
- 27 Z. Y. Wu, X. X. Xu, B. C. Hu, H. W. Liang, Y. Lin, L. F. Chen and S. H. Yu, *Angew. Chem. Int. Ed.*, 2015, **54**, 8179-8183.
- 28 H. Jin, H. Zhou, D. He, Z. Wang, Q. Wu, Q. Liang, S. Liu and S. Mu, *Appl. Catal., B, Environ.*, 2019, **250**, 143-149.
- 29 M. Hong, J. Nie, X. Zhang, P. Zhang, Q. Meng, J. Huang, Z. Xu, C. Du and J. Chen, *J. Mater. Chem. A*, 2019, **7**, 25557-25566.
- 30 H. Jin, H. Zhou, P. Ji, C. Zhang, J. Luo, W. Zeng, C. Hu, D. He and S. Mu, *Nano Res.*, 2020, **13**, 818-823.
- 31 H. Wang, F. X. Yin, N. Liu, R. H. Kou, X.B. He, C. J. Sun, B. H. Chen, D. J. Liu and H. Q. Yin, *Adv. Funct. Mater.*, 2019, **29**, 1901531.
- 32 Y. Deng, B. Chi, J. Li, G. Wang, L. Zheng, X. Shi, Z. Cui, L. Du, S. Liao, K. Zang, J. Luo, Y. Hu and X. Sun, *Adv. Energy Mater.*, 2019, **9**, 1802856.
- 33 Y. Li, X. Liu, L. Zheng, J. Shang, X. Wan, R. Hu, X. Guo, S. Hong and J. Shui, *J. Mater. Chem. A*, 2019, **7**, 26147-26153.
- 34 J. W. Huang, Q. Q. Cheng, Y. C. Huang, H. C. Yao, H. B. Zhu and H. Yang, *ACS Appl. Energy Mater.*, 2019, **2**, 3194-3203.
- 35 Q. Liu, X. Liu, L. Zheng and J. Shui, *Angew. Chem. Int. Ed.*, 2018, **57**, 1204-1208.
- 36 L. Gao, M. Xiao, Z. Jin, C. Liu, J. Ge and W. Xing, *J. Energy Chem.*, 2019, **35**, 17-23.
- 37 Z. Wang, H. Jin, T. Meng, K. Liao, W. Meng, J. Yang, D. He, Y. Xiong and S. Mu, *Adv. Funct. Mater.*, 2018, **28**, 1802596.
- 38 X. Zhao, P. Pachfule, S. Li, T. Langenhahn, M. Ye, G. Tian, J. Schmidt and A. Thomas, *Chem. Mater.*, 2019, **31**, 3274-3280.
- 39 Z. Hu, Z. Guo, Z. Zhang, M. Dou and F. Wang, *ACS Appl. Mater. Interfaces*, 2018, **10**, 12651-12658.
- 40 T. Liu, P. Zhao, X. Hua, W. Luo, S. Chen and G. Cheng, *J. Mater. Chem. A*, 2016, **4**, 11357-11364.
- 41 Q. Lin, X. Bu, A. Kong, C. Mao, X. Zhao, F. Bu and P. Feng, *J. Am. Chem. Soc.*, 2015, **137**, 2235-2238.
- 42 Z. Li, L. Wei, W. J. Jiang, Z. Hu, H. Luo, W. Zhao, T. Xu, W. Wu, M. Wu and J. S. Hu, *Appl. Catal., B, Environ.*, 2019, **251**, 240-246.
- 43 J. Wang and F. Ciucci, *Small*, 2017, **13**, 1604103.
- 44 N. Ranjbar Sahraie, J.P. Paraknowitsch, C. Gobel, A. Thomas and P. Strasser, *J. Am. Chem. Soc.*, 2014, **136**, 14486-14497.
- 45 W. Liu, Y. Hou, H. Pan, W. Liu, D. Qi, K. Wang, J. Jiang and X. Yao, *J. Mater. Chem. A*, 2018, **6**, 8349-8357.
- 46 W. Liu, K. Wang, C. Wang, W. Liu, H. Pan, Y. Xiang, D. Qi and J. Jiang, *J. Mater. Chem. A*, 2018, **6**, 22851-22857.
- 47 J. Li, S. Ghoshal, W. Liang, M. T. Sougrati, F. Jaouen, B. Halevi, S. McKinney, G. McCool, C. Ma, X. Yuan, Z. F.

- Ma, S. Mukerjee and Q. Jia, *Energy Environ. Sci.*, 2016, **9**, 2418-2432.
- 48 Y. Wang, N. Guo, L. Zhu, Y. Pan, R. Wang, Z. Zhang and S. Qiu, *Chem Commun.*, 2018, **54**, 12974-12977.
- 49 S. Li, C. Cheng, H. W. Liang, X. Feng and A. Thomas, *Adv. Mater.*, 2017, **29**, 1700707.
- 50 J. Guo, Y. Li, Y. Cheng, L. Dai and Z. Xiang, *ACS Nano*, 2017, **11**, 8379-8386.
- 51 B. Y. Guan, Y. Lu, Y. Wang, M. Wu and X. W. Lou, *Adv. Funct. Mater.*, 2018, **28**, 1706738.
- 52 F.L. Meng, Z.L. Wang, H.X. Zhong, J. Wang, J.M. Yan and X. B. Zhang, *Adv. Mater.*, 2016, **28**, 7948-7955.
- 53 M. Xiao, J. Zhu, L. Ma, Z. Jin, J. Ge, X. Deng, Y. Hou, Q. He, J. Li, Q. Jia, S. Mukerjee, R. Yang, Z. Jiang, D. Su, C. Liu and W. Xing, *ACS Catal.*, 2018, **8**, 2824-2832.
- 54 L. Huo, B. Liu, G. Zhang, R. Si, J. Liu and J. Zhang, *J. Mater. Chem. A*, 2017, **5**, 4868-4878.
- 55 L. Jiao, G. Wan, R. Zhang, H. Zhou, S. H. Yu and H. L. Jiang, *Angew. Chem. Int. Ed.*, 2018, **57**, 8525-8529.
- 56 S. Chen, N. Zhang, C.W. Narváez Villarrubia, X. Huang, L. Xie, X. Wang, X. Kong, H. Xu, G. Wu, J. Zeng and H. L. Wang, *Nano Res.*, 2020., <https://doi.org/10.1007/s12274-020-2768-y>.
- 57 R. Ding, Y. Liu, Z. Rui, J. Li, J. Liu and Z. Zou, *Nano Res.*, 2020., <https://doi.org/10.1007/s12274-020-2768-y>.
- 58 G. Zhang, Y. Jia, C. Zhang, X. Xiong, K. Sun, R. Chen, W. Chen, Y. Kuang, L. Zheng, H. Tang, W. Liu, J. Liu, X. Sun, W.-F. Lin and H. Dai, *Energy Environ. Sci.*, 2019, **12**, 1317-1325.
- 59 Y. Deng, B. Chi, X. Tian, Z. Cui, E. Liu, Q. Jia, W. Fan, G. Wang, D. Dang, M. Li, K. Zang, J. Luo, Y. Hu, S. Liao, X. Sun and S. Mukerjee, *J. Mater. Chem. A*, 2019, **7**, 5020-5030.
